# Supplementary material
Source: PubMed Central journal article supplement (PMC4848394)
Supplement: NIHMS745856-supplement-07.pdf [file NIHMS745856-supplement-07.pdf]

52 Immunoblot for PAPP-A2 of pregnancy sera (10uL; diluted 1:10 in PBS) from  
53 pregnancies at stated gestational ages (weeks+days) from normotensive (n=6; CTL) or  
54 preeclamptic (n=7; PE) pregnancies. Serum from non-pregnant female and male serve  
55 as negative controls and serum from pregnant female serves as positive control.  
56 Samples ordered by decreasing age (39 to 25 weeks gestation) within each category.  
57 Non-specific band (\*) at ~60kDa consistent with albumin shows protein loading. The 36-  
58 week CTL sample is clearly underloaded. (Image of full blot provided as supplemental  
59 data; Fig. S4)

60

61 **Figure 6: PAPP-A2 is not detectable in cord blood serum.**

62 Immunoblot for PAPP-A2 on venous cord blood serum (12 µl; 1:10 dilution with 1x PBS)  
63 from normotensive (n= 5) and preeclamptic (n=6) pregnancies with maternal serum from  
64 some of the same pregnancies (Mat; n=4). Gestational age at delivery noted as weeks  
65 + days above lane. Non-pregnant and pregnant sera serve as negative and positive  
66 controls. Non-specific band (\*) at ~60kDa consistent with albumin reflects protein  
67 loading. An overexposed film is shown to clarify lack of detection of PAPP-A2 in cord  
68 blood sera. (Image of full blot provided in supplemental data; Fig. S5).

69

70

71 Supplemental Data

72 **Table S1: Semi-quantitative PAPP-A2 Immunoreactivity**

73 Formalin-fixed serial tissue sections from across gestation were stained for cytokeratin-7  
74 (CK-7) to identify all trophoblasts, HLA-G to identify invasive CTBs, and PAPP-A2. The  
75 CK-7 and HLA-G staining identified trophoblast populations and served as control for  
76 staining quality of the tissue. PAPP-A2 immunoreactivity by cell type, as assessed by  
77 morphology and trophoblast staining, was scored as follows: (-) =no immunoreactivity,

78 +=light, +=moderate, and +++ =strong. Number of placentas with each degree of  
79 staining listed in ( ). The variability of staining is represented by range of staining  
80 intensity. STB: syncytiotrophoblasts, vCTB:villous cytotrophoblast,, CC: cell column,  
81 iCTB: invasive cytotrophoblast.

82

83

84 **Figure S1: Placental PAPP-A2 Expression Changes over Gestation.** Immunoblot of  
85 PAPP-A2 expression in chorionic villi in the second trimester. Image of the full blot  
86 presented in Fig. 3C. Image is overexposed to reveal all immunoreactive bands. Of  
87 interest the band pattern is different between the serum and the placental tissue lysates.  
88 Non-specific bands are present at ~50kDa and 75kDa in the placental lysates. Several  
89 samples have additional bands (15+5, 18+0 and 19+5) which may reflect alternative  
90 isoforms or degradation products at ~45kDa and ~60kDa. Of interest is the 23+3 week  
91 samples, which had minimally detectable  $\beta$ -actin (Fig.3C), does show similar levels of  
92 the ~50kDa non-specific band to the other samples.

93

94 **Figure S2: Labor does not effect PAPP-A2 expression in the placenta.**

95 Densitometry in relative units of PAPP-A2 levels normalized to  $\beta$ -actin determined by  
96 Immunoblot on basal plate (BP) protein lysates (Panel A) or chorionic villi (CV) protein  
97 lysates (Panel B) from term pregnancies delivered by scheduled cesarean section (n=8;  
98 non-labored) or vaginal delivery (n=8: labored). Data presented as mean and standard  
99 error. Statistical analysis performed using Student's t-test. There was no statistical  
100 difference in PAPP-A2 in labored ( $43.70 \pm 2.71$ ) and unlabored ( $34.00 \pm 2.45$ ) BP  
101 samples,  $p=0.25$ . There was no statistical difference in PAPP-A2 in labored ( $48.94 \pm$   
102  $3.06$ ) and unlabored ( $62.37 \pm 7.33$ ) CV samples,  $p=0.52$ .

103

104 **Figure S3: Placental PAPP-A2 expression levels for early onset and late onset**  
105 **preeclampsia (PE).** Data is that presented in Figure 4 broken out by early (24-34  
106 weeks) and late onset (35-40 weeks) PE and matched controls (CTL). Relative PAPP-  
107 A2 levels normalized to  $\beta$ -actin determined by immunoblot analysis of basal plate (A)  
108 and chorionic villi (B) protein lysates. Early onset are circles and late onset are triangles.  
109 CTLs are open symbols and PE is closed symbols. Statistical analysis by Kruskal-Wallis  
110 with Dunn's Post test showed only preterm CTI versus late PE were significantly different  
111 ( $p < 0.01$ ). Small sample sizes ( $n=4$ ) likely contributes to the lack of statistical  
112 differences.

113  
114 **Figure S4: Serum levels of PAPP-A2 are higher from pregnancies complicated by**  
115 **preeclampsia.** Image of the full immunoblot presented in Fig. 5 that has been  
116 overexposed to show all immunoreactive bands. PAPP-A2 is the ~220kDa band. Arrow  
117 points to band that may represent the alternative spiced form of PAPP-A2 reported by  
118 Klooverpris *et al.* ; although this band migrates at a higher molecular weight (>100kDa  
119 compared to ~70kDa). The broad band at ~60kDa (\*) likely represents non-specific  
120 binding of antibody to albumin based on Ponceau S staining of the membrane (data not  
121 shown).

122  
123  
124 **Figure S5: PAPP-A2 is not detectable in cord blood serum.** Image of the full  
125 immunoblot presented in Fig.6 that has been overexposed to show all immunoreactive  
126 bands. PAPP-A2 is the ~220kDa band. Arrow points to band that may represent the  
127 alternative spiced form of PAPP-A2 reported by Klooverpris *et al.* Although this band  
128 migrates at a higher molecular weight (>100kDa compared to ~70kDa). The broad band  
129 at ~60kDa (\*) likely represents non-specific binding of antibody to albumin based on

130 Ponceau S staining of the membrane (data not shown). The single band in sample Cord  
131 39 (between 75 and 100kDa) is not seen in any other sample and identity has not been  
132 determined.  
133
